# Supplementary material
Source: publisher figshare collection journal article supplement (https://sage.figshare.com/ndownloader/files/13765292)
Supplement: Supplementary file 1 [file 13765292]

## Web Appendix

### Egocentric Improvement Evaluations:

#### Change in the Self as an Anchor for Brand Improvement Judgments

## Web Appendix A

### *STUDY 1 INSTRUCTIONS*

Thank you for your participation. This research consists of two unrelated studies. The first study is a short self-assessment survey. The second study is a product evaluation task.

#### *STUDY 1 SELF-IMPROVEMENT WRITING TASK ("SELF-ASSESSMENT SURVEY")*

Sometimes people hope to change over time, because change can reflect positively on them. In the spaces below, please list three personally important positive ways in which you have changed over the past ten years.

#### *STUDY 1 PRODUCT EVALUATION INSTRUCTIONS AND MEASURES*

##### *Instructions*

Please view the following information comparing the Apple iPhone 5 and the Apple iPhone 6 and answer the questions that follow.

##### *Dependent Measures*

- To what extent is the iPhone 6 an improvement over the iPhone 5?
  - 1 (not at all) – 7 (very much)
- How much would you be willing to pay to upgrade from the iPhone 5 to the iPhone 6?
  - \$0 – \$500 sliding scale

##### *Perceived Self-Improvement*

- In general, how much improvement have you experienced over the past five years?
  - 1 (very little improvement) – 7 (a lot of improvement)
- In general, to what extent have you changed over the past five years?
  - 1 (not at all) – 7 (very much)

##### *Self-Brand Connection (Escalas & Bettman 2003)*

- How strongly do you identify with Apple?
  - 1 (not at all) – 7 (very strongly)
- How connected are you to Apple?
  - 1 (not at all) – 7 (very much)
- How much does Apple represent who you are?
  - 1 (not at all) – 7 (very much)

### Demographics

- Age (open-ended)
- Gender (male/female)

### STUDY 1 PRODUCT EVALUATION STIMULI

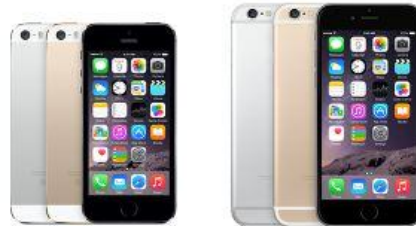

|                              | <u>iPhone 5</u>                                                                                                                                             | <u>iPhone 6</u>                                                                                                                                                                      |
|------------------------------|-------------------------------------------------------------------------------------------------------------------------------------------------------------|--------------------------------------------------------------------------------------------------------------------------------------------------------------------------------------|
| <b>Color and Finish</b>      | Silver<br>Gold<br>Space Gray                                                                                                                                | Silver<br>Gold<br>Space Gray                                                                                                                                                         |
| <b>Weight and Dimensions</b> | Height: 4.87 in.<br>Width: 2.31 in.<br>Depth: 0.30 in.<br>Weight: 3.95 oz.                                                                                  | Height: 5.44 in.<br>Width: 2.64 in.<br>Depth: 0.27 in.<br>Weight: 4.55 oz.                                                                                                           |
| <b>Chips</b>                 | A7 chip (64-bit)<br>M7 motion coprocessor                                                                                                                   | A8 chip (64-bit)<br>M8 motion coprocessor                                                                                                                                            |
| <b>Touch ID</b>              | Fingerprint identity sensor                                                                                                                                 | Fingerprint identity sensor                                                                                                                                                          |
| <b>Display</b>               | 4-inch Retina display<br>1136 x 640 resolution<br>326 ppi                                                                                                   | 4.7-inch Retina display<br>1334 x 750 resolution<br>326 ppi                                                                                                                          |
| <b>Cellular and Wireless</b> | GSM/EDGE<br>UMTS/HSPA+<br>DC-HSDPA<br>CDMA EV-DO Rev. A & B<br>LTE<br>Bluetooth 4.0<br>GPS and GLONASS<br>Wi-Fi (802.11a/b/g/n)                             | GSM/EDGE<br>UMTS/HSPA+<br>DC-HSDPA<br>CDMA EV-DO Rev. A & B<br>LTE<br>Bluetooth 4.0<br>GPS and GLONASS<br>Wi-Fi (802.11a/b/g/n/ac)                                                   |
| <b>iSight Camera</b>         | 8 megapixels<br>f/2.2 aperture<br>Sapphire crystal lens cover<br>Autofocus<br>Auto image stabilization<br>True Tone flash<br>Slo-mo video<br>Face detection | 8 megapixels<br>f/2.2 aperture<br>Sapphire crystal lens cover<br>Autofocus w/ Focus Pixels<br>Auto image stabilization<br>True Tone flash<br>Slo-mo video<br>Improved Face detection |
| <b>Power and Battery</b>     | Talk time: Up to 10 hrs.<br>Standby time: Up to 250 hrs<br>Web use: Up to 10 hrs<br>Video play: Up to 10 hrs<br>Audio play: Up to 40 hrs                    | Talk time: Up to 14 hrs.<br>Standby time: Up to 250 hrs<br>Web use: Up to 11 hrs<br>Video play: Up to 11 hrs<br>Audio play: Up to 50 hrs                                             |
| <b>SIM Card</b>              | Nano-SIM                                                                                                                                                    | Nano-SIM                                                                                                                                                                             |

# STUDY 1 RESULTS

## *Brand Improvement: Regression Testing Perceived Self-Improvement x SBC Interaction*

| Variable               | Coefficient | SE  | t     | p   |
|------------------------|-------------|-----|-------|-----|
| Intercept              | 4.19        | .15 | 28.04 | .00 |
| Self-Improvement       | .13         | .11 | 1.10  | .27 |
| SBC                    | .19         | .09 | 2.23  | .03 |
| Self-Improvement x SBC | .15         | .06 | 2.31  | .02 |

Note.— $R^2 = .14$ ,  $p < .01$ ; Perceived Self-Improvement and SBC are mean-centered.

## *WTP to Upgrade: Moderated Mediation by Brand Improvement*

| Variable                                                     | Coefficient | SE    | t     | p   | LLCI   | ULCI  |
|--------------------------------------------------------------|-------------|-------|-------|-----|--------|-------|
| <i>DV: Brand Improvement</i>                                 |             |       |       |     |        |       |
| Intercept                                                    | 4.19        | .15   | 28.04 | .00 | 3.90   | 4.49  |
| Self-Improvement                                             | .13         | .11   | 1.10  | .27 | -.10   | .35   |
| SBC                                                          | .19         | .09   | 2.23  | .03 | .02    | .36   |
| Self-Imp*SBC                                                 | .15         | .06   | 2.31  | .02 | .02    | .28   |
| <i>DV: WTP to Upgrade</i>                                    |             |       |       |     |        |       |
| Intercept                                                    | 30.12       | 27.69 | 1.09  | .28 | -24.84 | 85.07 |
| Brand Improvement                                            | 16.29       | 6.23  | 2.61  | .01 | 3.92   | 28.65 |
| Self-Improvement                                             | 5.16        | 7.01  | .74   | .46 | -8.75  | 19.07 |
| SBC                                                          | 21.41       | 5.41  | 3.96  | .00 | 10.68  | 32.15 |
| Self-Imp*SBC                                                 | 2.25        | 4.05  | .56   | .58 | -5.79  | 10.30 |
| <i>Conditional Indirect Effect through Brand Improvement</i> |             |       |       |     |        |       |
| Low SBC                                                      | -2.29       | 2.97  |       |     | -9.85  | 2.29  |
| High SBC                                                     | 6.37        | 4.46  |       |     | .09    | 17.89 |
| <i>Index of Moderated Mediation</i>                          |             |       |       |     |        |       |
| Brand Improvement                                            | 2.42        | 1.63  |       |     | .19    | 6.80  |

Note.—PROCESS Model 8; 5,000 bootstrapped samples; 95% CI. Low SBC and High SBC correspond to Mean  $\pm$  1 SD of SBC, respectively.

## Web Appendix B

### *STUDY 2 PRETEST INSTRUCTIONS*

Thank you for your participation. On the next screen, you will complete a short self-assessment task in which you will answer a prompt about how you see yourself. This will be followed by basic demographics.

### *STUDY 2 PRETEST SELF-IMPROVEMENT MANIPULATION*

#### *Improvement Condition*

Sometimes people hope to change over time, because change can reflect positively on them. In the spaces below, please list three personally important positive ways in which you have changed over the past five years.

#### *Stability Condition*

Sometimes people hope to remain the same over time, because stability can reflect positively on them. In the spaces below, please list three personally important positive ways in which you have remained the same over the past five years.

### *STUDY 2 PRETEST MEASURES*

#### *Dependent Measures*

- In general, how much improvement have you experienced over the past five years?
  - 1 (very little improvement) – 7 (a lot of improvement)
- How difficult was it for you to generate the three things you listed at the beginning of this survey?
  - 1 (very easy) – 7 (very difficult)

#### *Demographics*

- Age (open-ended)
- Gender (male/female)

## STUDY 2 PRETEST RESULTS

### *Dependent Variable Cell Means and SDs*

| <b>Condition</b> | <b>Self-Improvement Rating<br/>Mean (SD)</b> | <b>Task Difficulty Rating<br/>Mean (SD)</b> |
|------------------|----------------------------------------------|---------------------------------------------|
| Improvement      | 5.12 (1.25)                                  | 3.01 (1.78)                                 |
| Stability        | 4.62 (1.36)                                  | 3.11 (1.85)                                 |

### *Self-Improvement Rating: One-way ANOVA*

| <b>Source</b>    | <b>Type III SS</b> | <b>df</b> | <b>MS</b> | <b>F</b> | <b>p</b> |
|------------------|--------------------|-----------|-----------|----------|----------|
| Model            | 7.87               | 1         | 7.87      | 4.65     | .03      |
| Intercept        | 3030.56            | 1         | 3030.56   | 1789.59  | .00      |
| Self-Improvement | 7.87               | 1         | 7.87      | 4.65     | .03      |
| Error            | 213.37             | 126       | 1.69      |          |          |
| Total            | 3273.00            | 128       |           |          |          |

### *Task Difficulty Rating: One-way ANOVA*

| <b>Source</b>    | <b>Type III SS</b> | <b>df</b> | <b>MS</b> | <b>F</b> | <b>p</b> |
|------------------|--------------------|-----------|-----------|----------|----------|
| Model            | .32                | 1         | .32       | .10      | .76      |
| Intercept        | 1199.69            | 1         | 1199.69   | 364.09   | .00      |
| Self-Improvement | .32                | 1         | .32       | .10      | .76      |
| Error            | 415.18             | 126       | 3.30      |          |          |
| Total            | 1616.00            | 128       |           |          |          |

## STUDY 2 INSTRUCTIONS

This survey consists of two unrelated tasks. In one part of the survey, you will complete a writing task in which you describe either yourself or a friend. In another part of the survey, you will complete a brand evaluation task. Specifically, you will view some information comparing two phones and evaluate the phones on various dimensions. Lastly, you will provide basic demographic information.

### *STUDY 2 SELF-BRAND CONNECTION MEASURE (ESCALAS & BETTMAN 2003)*

- The brand Samsung reflects who I am.
- I can identify with the brand Samsung.
- I feel a personal connection to the brand Samsung.
- I can use the brand Samsung to communicate who I am to other people.
- I think the brand Samsung could help me become the type of person I want to be.
- I consider the brand Samsung to be "me" (it reflects who I consider myself to be or the way that I want to present myself to others).
- The brand Samsung suits me well.
  - 0 (strongly disagree) – 100 (strongly agree) sliding scales for all items

## STUDY 2 SELF-IMPROVEMENT AND SELF-FOCUS MANIPULATIONS

### *Improvement– Self Focus Condition*

Sometimes people hope to change over time, because change can reflect positively on them. In the spaces below, please list three personally important positive ways in which you have changed over the past five years.

### *Stability– Self Focus Condition*

Sometimes people hope to remain the same over time, because stability can reflect positively on them. In the spaces below, please list three personally important positive ways in which you have remained the same over the past five years.

### *Improvement–Other Focus Condition*

Sometimes people hope to change over time, because change can reflect positively on them. Think of a friend and in the spaces below, please list three personally important positive ways in which your friend has changed over the past five years.

### *Stability–Other Focus Condition*

Sometimes people hope to remain the same over time, because stability can reflect positively on them. Think of a friend and in the spaces below, please list three personally important positive ways in which your friend has remained the same over the past five years.

## STUDY 2 PRODUCT EVALUATION INSTRUCTIONS

Please view the following information about the Samsung Galaxy S4 and the Samsung Galaxy S5 and answer the questions that follow.

## STUDY 2 MEASURES

### *Dependent Measures*

- How similar are the Samsung Galaxy S4 and the Samsung Galaxy S5?
  - 1 (not at all similar) – 7 (very similar)
- How different are the Samsung Galaxy S4 and the Samsung Galaxy S5?
  - 1 (not at all different) – 7 (very different)
- How much better or worse is the Samsung Galaxy S5 than the Samsung Galaxy S4?
  - 1 (the S5 is much worse than the S4) – 7 (the S5 is much better than the S4)
- To what extent is the Samsung Galaxy S5 an improvement on the Samsung Galaxy S4?
  - 1 (not at all) – 7 (very much)
- Which picture best describes the relationship between the Samsung Galaxy S4 and the Samsung Galaxy S5?

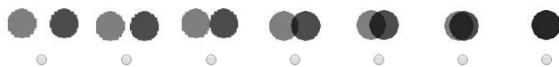

- What is the likelihood that you would upgrade from the Samsung Galaxy S4 to the Samsung Galaxy S5?
  - 1 (unlikely) – 7 (likely)

### *Improvement Manipulation Checks*

- During the writing task, I was thinking of ways that I have been changing over time.
- During the writing task, I was thinking of ways that I have remained the same over time.
- During the writing task, I was thinking of ways that my friend has been changing over time.
- During the writing task, I was thinking of ways that my friend has remained the same over time.
  - 1 (strongly disagree) – 7 (strongly agree) scale for all items

### *Demographics and Suspicion Measures*

- Age (open-ended)
- Gender (male/female)
- What do you think this was the purpose of this study?

### *STUDY 2 PRODUCT EVALUATION STIMULI*

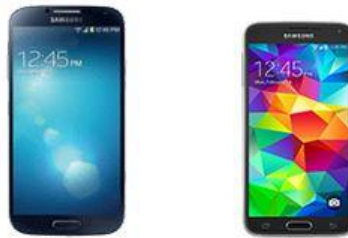

|                          | Samsung Galaxy S4                                                                                    | Samsung Galaxy S5                                                                                    |
|--------------------------|------------------------------------------------------------------------------------------------------|------------------------------------------------------------------------------------------------------|
| <b>Power and Battery</b> | Talk time: max 17 hrs.<br>Music play: max 69 hrs.<br>Web use: max 10 hrs.<br>Video play: max 11 hrs. | Talk time: max 29 hrs.<br>Music play: max 70 hrs.<br>Web use: max 13 hrs.<br>Video play: max 14 hrs. |
| <b>Size</b>              | Height: 5.38 in.<br>Width: 2.74 in.<br>Depth: 0.31 in.                                               | Height: 5.59 in.<br>Width: 2.85 in.<br>Depth: 0.31 in.                                               |
| <b>Memory</b>            | Up to 64 GB w/external drive                                                                         | Up to 128 GB w/external drive                                                                        |
| <b>Processor Chip</b>    | Qualcomm Snapdragon 600<br>1.9 GHz                                                                   | Qualcomm Snapdragon 801<br>2.5 GHz                                                                   |
| <b>Display</b>           | 5.0-inch Super AMOLED<br>1080 x 1920 pixels                                                          | 5.1-inch Super AMOLED<br>1080 x 1920 pixels                                                          |
| <b>Security</b>          | --                                                                                                   | Fingerprint reader                                                                                   |
| <b>Camera</b>            | 13 megapixels<br>--<br>--                                                                            | 16 megapixels<br>Selective Focus<br>HDR Live Mode<br>Embedded heart rate sensor                      |
| <b>Color</b>             | Black<br>White<br>Blue<br>Brown                                                                      | Black<br>White<br>Blue<br>Gold                                                                       |

## STUDY 2 RESULTS

*Brand Improvement: Regression Testing Self-Improvement x SBC x Self-Focus Interaction*

| Variable                | Coefficient | SE   | t     | p   |
|-------------------------|-------------|------|-------|-----|
| Intercept               | 4.02        | .07  | 56.37 | .00 |
| Self-Improvement        | -.05        | .07  | -.64  | .52 |
| SBC                     | .01         | .003 | 2.80  | .01 |
| Self-Focus              | .06         | .07  | .83   | .41 |
| Self-Imp*SBC            | .004        | .003 | 1.20  | .23 |
| Self-Imp*Self-Focus     | .09         | .07  | 1.20  | .23 |
| SBC*Self-Focus          | -.01        | .003 | -1.78 | .08 |
| Self-Imp*SBC*Self-Focus | .01         | .003 | 2.76  | .01 |

Note.— $R^2 = .15$ ,  $p < .01$ ; Self-Improvement and Self-Focus are contrast-coded, and SBC is mean-centered.

*Upgrade Intentions: 3-way Moderated Mediation by Brand Improvement*

| Variable                                                     | Coefficient | SE   | t     | p   | LLCI  | ULCI |
|--------------------------------------------------------------|-------------|------|-------|-----|-------|------|
| <i>DV: Brand Improvement</i>                                 |             |      |       |     |       |      |
| Intercept                                                    | 4.02        | .07  | 56.37 | .00 | 3.88  | 4.16 |
| Self-Improvement                                             | -.05        | .07  | -.64  | .52 | -.19  | .10  |
| SBC                                                          | .01         | .003 | 2.80  | .01 | .002  | .014 |
| Self-Focus                                                   | .06         | .07  | .83   | .41 | -.08  | .20  |
| Self-Imp*SBC                                                 | .004        | .003 | 1.20  | .23 | -.002 | .009 |
| Self-Imp*Self-Focus                                          | .09         | .07  | 1.20  | .23 | -.06  | .23  |
| SBC*Self-Focus                                               | -.01        | .003 | -1.78 | .08 | -.011 | .001 |
| Self-Imp*SBC*Self-Focus                                      | .01         | .003 | 2.76  | .01 | .002  | .014 |
| <i>DV: WTP to Upgrade</i>                                    |             |      |       |     |       |      |
| Intercept                                                    | -.78        | .75  | -1.04 | .30 | -2.26 | .70  |
| Brand Improvement                                            | 1.20        | .18  | 6.55  | .00 | .83   | 1.56 |
| Self-Improvement                                             | -.18        | .14  | -1.25 | .21 | -.46  | .10  |
| SBC                                                          | .01         | .01  | 1.95  | .05 | -.00  | .02  |
| Self-Focus                                                   | -.38        | .14  | -2.65 | .01 | -.66  | -.10 |
| Self-Imp*SBC                                                 | -.001       | .01  | -.22  | .83 | -.01  | .01  |
| Self-Imp*Self-Focus                                          | .09         | .14  | .60   | .55 | -.20  | .37  |
| SBC*Self-Focus                                               | .01         | .01  | 1.15  | .25 | -.005 | .02  |
| Self-Imp*SBC*Self-Focus                                      | .01         | .01  | 1.23  | .22 | -.004 | .019 |
| <i>Conditional Indirect Effect through Brand Improvement</i> |             |      |       |     |       |      |
| Low SBC/Other Focus                                          | -.02        | .17  |       |     | -.37  | .31  |
| Low SBC/Self Focus                                           | -.29        | .22  |       |     | -.81  | .08  |
| High SBC/Other Focus                                         | -.29        | .19  |       |     | -.68  | .08  |
| High SBC/Self Focus                                          | .39         | .14  |       |     | .11   | .68  |
| <i>Indirect Effect of Highest Order Product</i>              |             |      |       |     |       |      |
| Brand Improvement                                            | .01         | .004 |       |     | .003  | .018 |

Note.—PROCESS Model 12; 5,000 bootstrapped samples; 95% CI. Low SBC and High SBC correspond to Mean  $\pm$  1 SD of SBC, respectively.

## Web Appendix C

### *STUDY 3 INSTRUCTIONS*

This survey consists of two unrelated tasks. In one part of the survey, you will complete a self-assessment writing task. In another part of the survey, you will complete a brand evaluation task. Lastly, you will complete some brief personality scales and provide basic demographic information.

### *STUDY 3 SELF-BRAND CONNECTION MANIPULATION*

#### *High SBC Condition*

In the space below, please enter one of your favorite brands. This should be a brand that you feel very connected to and that represents who you are.

#### *Low SBC Condition*

In the space below, please enter one of your least favorite brands. This should be a brand that you do not feel very connected to and that does not represent who you are.

### *STUDY 3 SELF-IMPROVEMENT MANIPULATION*

#### *Improvement Condition*

Sometimes people hope to change over time, because change can reflect positively on them. In the spaces below, please list three personally important positive ways in which you have changed over the past five years.

#### *Stability Condition*

Sometimes people hope to remain the same over time, because stability can reflect positively on them. In the spaces below, please list three personally important positive ways in which you have remained the same over the past five years.

### *STUDY 3 MEASURES*

#### *Dependent Measures*

- How similar is the brand [insert brand name] now compared to five years ago?
  - 1 (not at all similar) – 7 (very similar)
- How different is the brand [insert brand name] name compared to five years ago?
  - 1 (not at all different) – 7 (very different)

#### *Private Self-Consciousness (Scheier and Carver 1985)*

- I'm always trying to figure myself out.
- I think about myself a lot.
- I often daydream about myself.

- I never take a hard look at myself. (reverse-coded)
- I generally pay attention to my inner feelings.
- I'm constantly thinking about my reasons for doing things.
- I sometimes step back (in my mind) in order to examine myself from a distance.
- I'm quick to notice changes in my mood.
- I know the way my mind works when I work through a problem.
  - 1 (not at all like me) – 4 (a lot like me) scale for all items

*Self-Improvement Manipulation Check*

- During the self-assessment task, I was thinking of ways that I have been changing over time.
- During the self-assessment task, I was thinking of ways that I have remained the same over time.
  - 1 (strongly disagree) – 7 (strongly agree) scale for all items

*SBC Manipulation Check (Escalas and Bettman 2003)*

- I feel a personal connection to the brand [insert brand name]
- I can identify with the brand [insert brand name]
- The brand [insert brand name] reflects who I am
  - 1 (strongly disagree) – 7 (strongly agree)

*Demographics*

- Age (open-ended)
- Gender (male/female)

*STUDY 3 RESULTS*

*Brand Improvement: Regression Testing Self-Improvement x SBC x Trait Self-Consciousness Interaction*

| Variable               | Coefficient | SE  | t     | p   |
|------------------------|-------------|-----|-------|-----|
| Intercept              | 2.90        | .12 | 23.51 | .00 |
| Self-Improvement       | .10         | .12 | .78   | .44 |
| SBC                    | .27         | .12 | 2.22  | .03 |
| Self-Consciousness     | .07         | .22 | .29   | .77 |
| Self-Imp*SBC           | .19         | .12 | 1.57  | .12 |
| Self-Imp*Self-Con      | .03         | .22 | .13   | .89 |
| SBC*Self-Con           | -.09        | .22 | -.40  | .69 |
| Self-Imp* SBC*Self-Con | .81         | .22 | 3.65  | .00 |

Note.— $R^2 = .16$ ,  $p < .01$ ; Self-Improvement and SBC are contrast-coded, and Self-Consciousness is mean-centered.

## Web Appendix D

### *STUDY 4 INSTRUCTIONS*

Thank you for your participation. This study consists of two different parts. In the first part, you will complete a self-perception and personality survey. In the second part, you will complete a brand evaluation task in which you will share your views about different brands.

#### *STUDY 4 HIGH SBC BRAND ELICITATION TASK*

In the spaces below, please enter one of your favorite brands in the athletic shoe category. This should be a brand that you own and feel very connected to and that represents who you are.

#### *STUDY 4 SELF-IMPROVEMENT MANIPULATION*

##### *Improvement Condition*

Sometimes people hope to change over time, because change can reflect positively on them. In the spaces below, please list three personally important positive ways in which you have changed over the past five years.

##### *Stability Condition*

Sometimes people hope to remain the same over time, because stability can reflect positively on them. In the spaces below, please list three personally important positive ways in which you have remained the same over the past five years.

#### *STUDY 4 SELF-AFFIRMATION MANIPULATION (BRENDL ET AL. 2005)*

##### *Self-Affirmation Condition*

In the space below, please provide a short description of an important area of your life where you are satisfied with yourself. Specifically, write at least three lines about a positive aspect of yourself that you like, such as a personal trait or characteristic.

##### *Control Condition*

In the space below, please provide a short description of your most important criteria when packing for a trip. Specifically, write at least three lines about the thoughts that go through your mind and how you decide what to bring and what to leave behind.

### *STUDY 4 MEASURES*

#### *Dependent Measures*

- How much better are [insert brand name] athletic shoes now compared to five years ago?
  - 1 (not at all better now) – 7 (much better now)
- Imagine that you are shopping for a new pair of athletic shoes and the brand [insert brand name] released a new version of the shoes that you wish to replace. What is the likelihood that you would purchase the new shoes?
  - 1 (unlikely) – 7 (likely)

- Imagine that you are shopping for a new pair of athletic shoes and the brand [insert brand name] recently released a new version of the shoes that you wish to replace. How much would you be willing to pay for the new shoes?
  - \$0 - \$300 sliding scale

*Self-Improvement Manipulation Check*

- During the self-perception survey, I was thinking of ways that I have been improving over time.
  - 1 (strongly disagree) – 7 (strongly agree)

*SBC Check (Escalas and Bettman 2003)*

- I feel a personal connection to the brand [insert brand name]
- I can identify with the brand [insert brand name]
- The brand [insert brand name] reflects who I am
  - 1 (strongly disagree) – 7 (strongly agree)

*Self-Affirmation Manipulation Check*

- Earlier in this survey, you were asked to describe yourself and you wrote “[insert text from self-affirmation manipulation here].” How does this aspect of your life make you feel about yourself?
  - 1 (very negatively) – 7 (very positively)

*Demographics*

- Age (open-ended)
- Gender (male/female)

## STUDY 4 RESULTS

*Brand Improvement: Cell Means and SDs*

| Condition                     | Brand Improvement Mean (SD) |
|-------------------------------|-----------------------------|
| Stability/Control             | 4.40 (1.56)                 |
| Improvement/Control           | 5.23 (1.35)                 |
| Stability/Self-Affirmation    | 4.74 (1.40)                 |
| Improvement/ Self-Affirmation | 4.71 (1.51)                 |

*Brand Improvement: 2 (Self-Improvement) x2 (Self-Affirmation) ANOVA*

| Source            | Type III SS | df  | MS      | F       | p   |
|-------------------|-------------|-----|---------|---------|-----|
| Model             | 18.21       | 3   | 6.07    | 2.85    | .04 |
| Intercept         | 4708.91     | 1   | 4708.91 | 2212.14 | .00 |
| Self-Improvement  | 8.28        | 1   | 8.28    | 3.89    | .05 |
| Self-Affirmation  | .42         | 1   | .42     | .20     | .66 |
| Self-Imp*Self-Aff | 9.41        | 1   | 9.41    | 4.42    | .04 |
| Error             | 432.12      | 203 | 2.13    |         |     |
| Total             | 5166.00     | 207 |         |         |     |

Note.— $R^2 = .04$ ,  $p = .04$

*Upgrade Intentions: Moderated Mediation by Brand Improvement*

| <b>Variable</b>                                              | <b>Coefficient</b> | <b>SE</b> | <b>t</b> | <b>p</b> | <b>LLCI</b> | <b>ULCI</b> |
|--------------------------------------------------------------|--------------------|-----------|----------|----------|-------------|-------------|
| <i>DV: Brand Improvement</i>                                 |                    |           |          |          |             |             |
| Intercept                                                    | 4.40               | .20       | 21.77    | .00      | 4.00        | 4.80        |
| Self-Improvement                                             | .83                | .29       | 2.89     | .00      | .26         | 1.39        |
| Self-Affirmation                                             | .34                | .28       | 1.19     | .24      | -.22        | .90         |
| Self-Imp*Self-Aff                                            | -.85               | .41       | -2.10    | .04      | -1.65       | -.05        |
| <i>DV: Upgrade Intentions</i>                                |                    |           |          |          |             |             |
| Intercept                                                    | 3.26               | .40       | 8.17     | .00      | 2.47        | 4.05        |
| Brand Improvement                                            | .38                | .08       | 4.97     | .00      | .23         | .53         |
| Self-Improvement                                             | -.04               | .32       | -.14     | .89      | -.67        | .58         |
| Self-Affirmation                                             | .19                | .31       | .62      | .54      | -.42        | .80         |
| Self-Imp*Self-Aff                                            | -.02               | .44       | -.06     | .96      | -.90        | .85         |
| <i>Conditional Indirect Effect through Brand Improvement</i> |                    |           |          |          |             |             |
| Control                                                      | .31                | .14       |          |          | .10         | .64         |
| Self-Affirmation                                             | -.01               | .11       |          |          | -.25        | .21         |
| <i>Index of Moderated Mediation</i>                          |                    |           |          |          |             |             |
| Brand Improvement                                            | -.32               | .18       |          |          | -.78        | -.04        |

Note.—PROCESS Model 8; 5,000 bootstrapped samples; 95% CI.

*WTP to Upgrade: Moderated Mediation by Brand Improvement*

| <b>Variable</b>                                              | <b>Coefficient</b> | <b>SE</b> | <b>t</b> | <b>p</b> | <b>LLCI</b> | <b>ULCI</b> |
|--------------------------------------------------------------|--------------------|-----------|----------|----------|-------------|-------------|
| <i>DV: Brand Improvement</i>                                 |                    |           |          |          |             |             |
| Intercept                                                    | 4.40               | .20       | 21.77    | .00      | 4.00        | 4.80        |
| Self-Improvement                                             | .83                | .29       | 2.89     | .00      | .26         | 1.39        |
| Self-Affirmation                                             | .34                | .28       | 1.19     | .24      | -.22        | .90         |
| Self-Imp*Self-Aff                                            | -.85               | .41       | -2.10    | .04      | -1.65       | -.05        |
| <i>DV: WTP to Upgrade</i>                                    |                    |           |          |          |             |             |
| Intercept                                                    | 71.79              | 10.25     | 7.01     | .00      | 51.59       | 92.00       |
| Brand Improvement                                            | 8.46               | 1.95      | 4.35     | .00      | 4.62        | 12.30       |
| Self-Improvement                                             | -19.84             | 8.10      | -2.45    | .02      | -35.81      | -3.88       |
| Self-Affirmation                                             | 2.55               | 7.89      | .32      | .75      | -13.01      | 18.10       |
| Self-Imp*Self-Aff                                            | 14.80              | 11.38     | 1.30     | .19      | -7.64       | 37.23       |
| <i>Conditional Indirect Effect through Brand Improvement</i> |                    |           |          |          |             |             |
| Control                                                      | 7.00               | 3.06      |          |          | 2.33        | 14.71       |
| Self-Affirmation                                             | -.22               | 2.50      |          |          | -5.53       | 4.65        |
| <i>Index of Moderated Mediation</i>                          |                    |           |          |          |             |             |
| Brand Improvement                                            | -7.22              | 3.97      |          |          | -17.22      | -1.19       |

Note.—PROCESS Model 8; 5,000 bootstrapped samples; 95% CI.

## Web Appendix E

### STUDY 5 PRETEST INSTRUCTIONS

On the following screen, you will be presented with an advertisement for the Apple iPhone 7. Please take some time to view the advertisement and then answer the questions that follow.

### STUDY 5 PRETEST SELF-IMPROVEMENT AD MANIPULATION

*Improvement Ad*

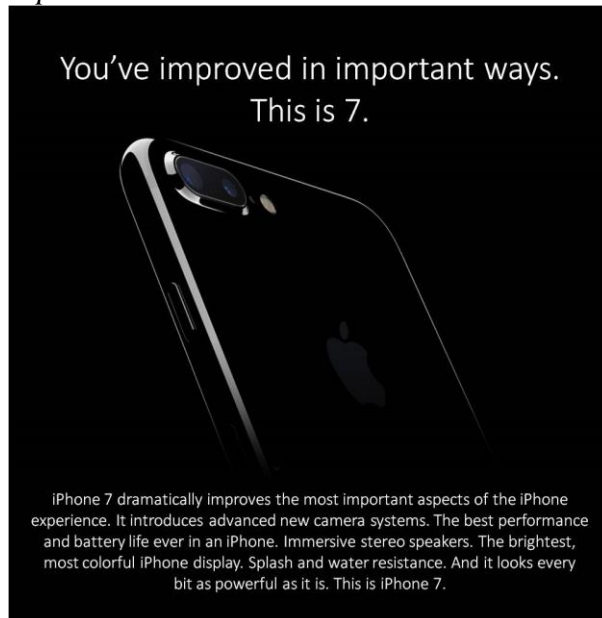

*Control Ad*

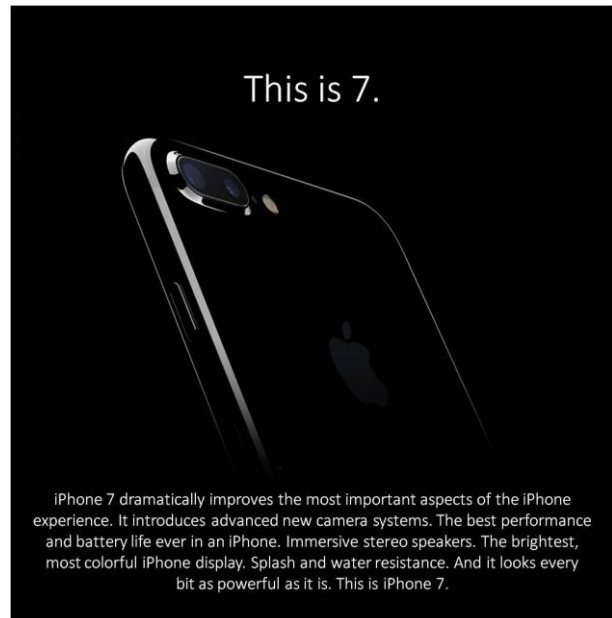

### STUDY 5 PRETEST MEASURES

#### *Dependent Measures*

- Overall, how have you changed over the past five years
  - 1 (much worse now than 5 years ago) – 7 (much better now than 5 years ago)
- How much better are you now relative to five years ago?
  - 1 (not at all better now) – 7 (much better now)

#### *Demographics*

- Age (open-ended)
- Gender (male/female/other)

### STUDY 5 PRETEST RESULTS

#### Self-Improvement Cell Means and SDs

| Condition   | Self-Improvement Rating<br>Mean (SD) |
|-------------|--------------------------------------|
| Improvement | 4.53 (1.51)                          |
| Control     | 5.03 (1.24)                          |

#### Self-Improvement Rating: One-way ANOVA

| Source    | Type III SS | df  | MS      | F       | p    |
|-----------|-------------|-----|---------|---------|------|
| Model     | 8.95        | 1   | 8.95    | 4.53    | .035 |
| Intercept | 3245.14     | 1   | 3245.14 | 1642.03 | .00  |
| Ad        | 8.95        | 1   | 8.95    | 4.53    | .035 |
| Error     | 282.61      | 143 | 1.98    |         |      |
| Total     | 3556.00     | 145 |         |         |      |

### STUDY 5 INSTRUCTIONS

Thank you for your participation. This survey consists of a few unrelated tasks. First, you will take a cognitive skills test. This will be followed by a consumer product evaluation survey. Specifically, you will view some promotional material for a currently available product and then share your opinion of the product and the advertisement. Additionally, you will complete some personality scales.

### STUDY 5 VISUOSPATIAL REASONING TASK

Examples of dot arrays from visuospatial reasoning task. After each grid flashed on the screen, participants indicated the number of red dots they saw.

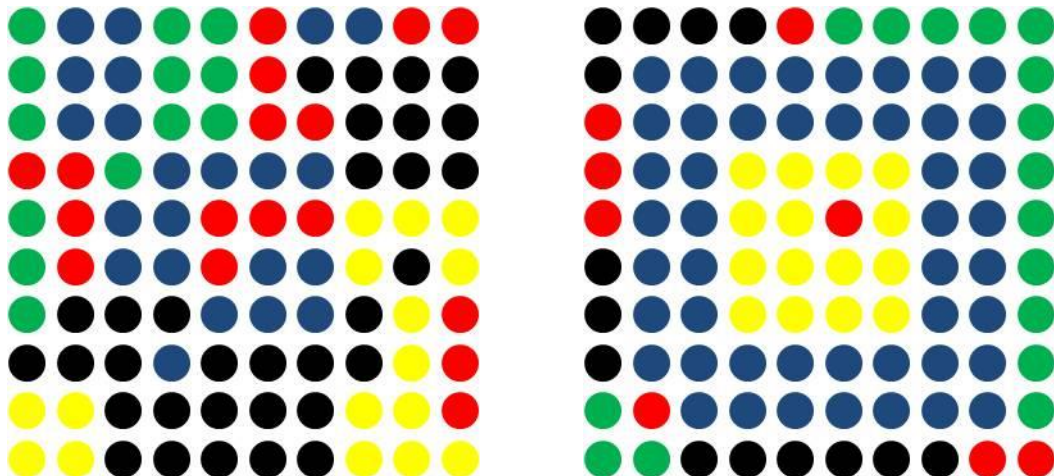

### STUDY 5 THREAT MANIPULATION

#### *Low Threat Condition*

You correctly answered 11 out of 15 questions. You are in the top 30% of people who have taken this test.

#### *High Threat Condition*

You correctly answered 4 out of 15 questions. You are in the bottom 30% of people who have taken this test.

### STUDY 5 PRODUCT EVALUATION INSTRUCTIONS

On the following screen, you will be presented with an advertisement for the Apple iPhone 7. Please take some time to view the advertisement and then answer the questions that follow.

### STUDY 5 AD MANIPULATION

See advertisements from the Study 5 Pretest.

### STUDY 5 MEASURES

#### *Dependent Measures – Brand Improvement*

- How much has the iPhone evolved between the first model and the most recent model?
  - 1 (not at all) – 7 (very much)
- How does the iPhone 7 compare to previous iPhone models?
  - 1 (iPhone 7 is not at all more advanced than previous models) – 7 (iPhone 7 is much more advanced than previous models)
- To what extent is the iPhone 7 an improvement over previous iPhone models?
  - 1 (not at all) – 7 (very much)
- How much better is the iPhone 7 than previous iPhone models?
  - 1 (iPhone 7 is not at all better than previous models) – 7 (iPhone 7 is much better than previous models)

#### *Dependent Measures – Product Upgrade*

- What is the likelihood that you would purchase the iPhone 7?
  - 1 (very unlikely) – 7 (very likely)
- What is the likelihood that you would trade your current phone in for the iPhone 7?
  - 1 (not at all) – 7 (very much)
- What is your reservation price for the iPhone 7? That is, what is the most you would be willing to pay in order to obtain this phone?
  - open-ended

#### *Self-Improvement Thoughts*

- While completing the product evaluation task, to what extent were you thinking of ways that you have improved over time?
  - 1 (not at all) – 7 (very much)

### Filler Task

**Instructions:** In this task, we are interested in your ability to solve word puzzles. Below is a crossword puzzle. Please attempt to solve the puzzle as quickly and efficiently as you can. We are interested in the speed at which you answer the crossword.

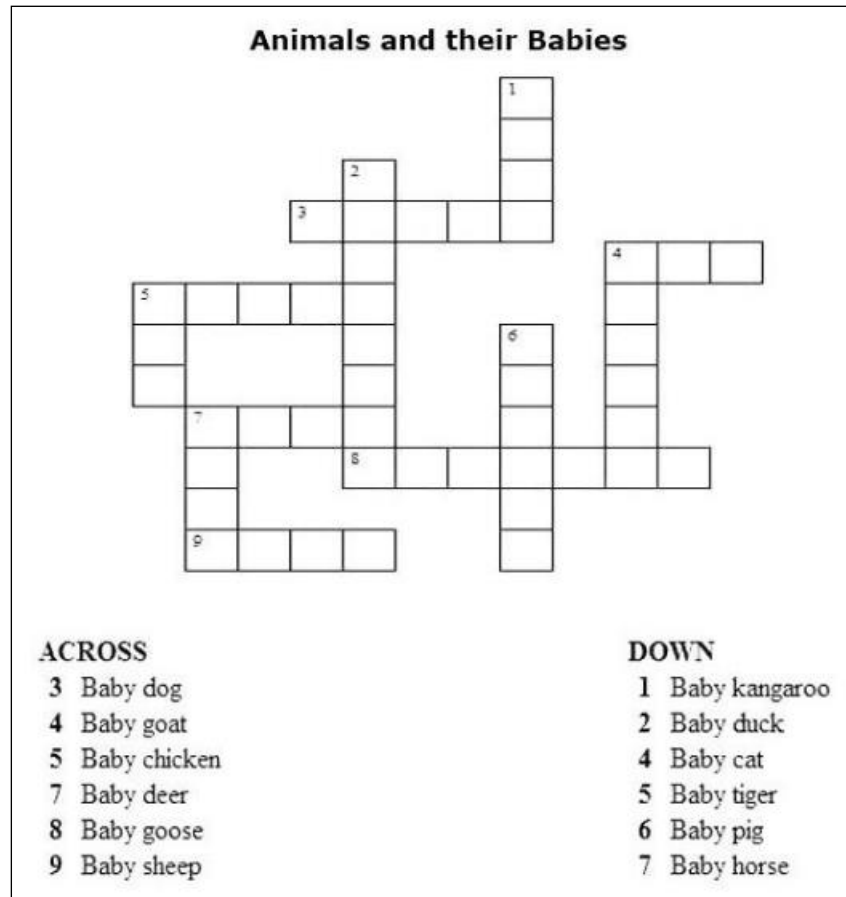

### Moderator – Apple Self-Brand Connection (Escalas & Bettman 2003)

- The brand Apple reflects who I am.
- I can identify with the brand Samsung.
- I feel a personal connection to the brand Samsung.
- I can use the brand Samsung to communicate who I am to other people.
- I think the brand Samsung could help me become the type of person I want to be.
- I consider the brand Samsung to be "me" (it reflects who I consider myself to be or the way that I want to present myself to others).
- The brand Samsung suits me well.
  - 1 (strongly disagree) – 7 (strongly agree)

### Threat Manipulation Check

- How would you describe your performance on the visuospatial reasoning test?
  - 1 (very low) – 7 (very high)

- How does your performance on the visuospatial reasoning test make you feel about yourself?
  - 1 (very bad) – 7 (very good)

#### *Demographics*

- Age (open-ended)
- Gender (male/female)

### *STUDY 5 RESULTS*

#### *Upgrade Intentions: Serial Moderated Moderated Mediation*

| <b>Variable</b>                                                                                   | <b>Coefficient</b> | <b>SE</b> | <b>t</b> | <b>p</b> | <b>LLCI</b> | <b>ULCI</b> |
|---------------------------------------------------------------------------------------------------|--------------------|-----------|----------|----------|-------------|-------------|
| <i>Outcome: Self-Improvement Thoughts</i>                                                         |                    |           |          |          |             |             |
| Intercept                                                                                         | .73                | .40       | 1.82     | .07      | -.06        | 1.52        |
| Ad                                                                                                | .99                | .54       | 1.82     | .07      | -.08        | 2.06        |
| Self-Threat                                                                                       | .63                | .57       | 1.09     | .28      | -.50        | 1.76        |
| SBC                                                                                               | .71                | .10       | 7.11     | .00      | .51         | .90         |
| Ad*Self-Threat                                                                                    | -.79               | .78       | -1.01    | .31      | -2.32       | .74         |
| Ad*SBC                                                                                            | -.29               | .14       | -2.06    | .04      | -.57        | -.01        |
| Self-Threat*SBC                                                                                   | -.38               | .15       | -2.49    | .01      | -.68        | -.08        |
| Ad*Self-Threat*SBC                                                                                | .46                | .21       | 2.19     | .03      | .05         | .87         |
| <i>Outcome: Brand Improvement</i>                                                                 |                    |           |          |          |             |             |
| Intercept                                                                                         | 4.98               | .13       | 39.86    | .00      | 4.74        | 5.23        |
| Ad                                                                                                | -.11               | .12       | -.87     | .39      | -.35        | .14         |
| Self-Imp Thoughts                                                                                 | .09                | .03       | 2.91     | .00      | .03         | .15         |
| <i>Outcome: Upgrade Intentions</i>                                                                |                    |           |          |          |             |             |
| Intercept                                                                                         | -.42               | .43       | -.99     | .32      | -1.26       | .42         |
| Ad                                                                                                | -.28               | .19       | -1.46    | .15      | -.65        | .10         |
| Self-Imp Thoughts                                                                                 | .35                | .05       | 7.18     | .00      | .25         | .44         |
| Brand Improvement                                                                                 | .62                | .08       | 8.04     | .00      | .47         | .77         |
| <i>Conditional Serial Indirect Effect through Self-Improvement Thoughts and Brand Improvement</i> |                    |           |          |          |             |             |
| Low Threat/Low SBC                                                                                | .03                | .02       |          |          | -.01        | .08         |
| Low Threat/High SBC                                                                               | -.03               | .02       |          |          | -.08        | .01         |
| High Threat/Low SBC                                                                               | .03                | .02       |          |          | -.01        | .08         |
| High Threat/High SBC                                                                              | .06                | .03       |          |          | .01         | .13         |
| <i>Index of Moderated Moderated Mediation</i>                                                     |                    |           |          |          |             |             |
| Index                                                                                             | .03                | .02       |          |          | .001        | .06         |

Note.—Custom PROCESS Model; 5,000 bootstrapped samples; 95% CI. Ad is coded so that 0 = control iPhone ad, 1 = self-improvement iPhone ad. Self-threat is coded so that 0 = low threat, 1 = high threat. Low and high SBC correspond to mean  $\pm$  1 SD of SBC, respectively.

*WTP: Serial Moderated Moderated Mediation*

| <b>Variable</b>                                                                                   | <b>Coefficient</b> | <b>SE</b> | <b>t</b> | <b>p</b> | <b>LLCI</b> | <b>ULCI</b> |
|---------------------------------------------------------------------------------------------------|--------------------|-----------|----------|----------|-------------|-------------|
| <i>Outcome: Self-Improvement Thoughts</i>                                                         |                    |           |          |          |             |             |
| Intercept                                                                                         | .73                | .40       | 1.82     | .07      | -.06        | 1.52        |
| Ad                                                                                                | .99                | .54       | 1.82     | .07      | -.08        | 2.06        |
| Self-Threat                                                                                       | .63                | .57       | 1.09     | .28      | -.50        | 1.76        |
| SBC                                                                                               | .71                | .10       | 7.11     | .00      | .51         | .90         |
| Ad*Self-Threat                                                                                    | -.79               | .78       | -1.01    | .31      | -2.32       | .74         |
| Ad*SBC                                                                                            | -.29               | .14       | -2.06    | .04      | -.57        | -.01        |
| Self-Threat*SBC                                                                                   | -.38               | .15       | -2.49    | .01      | -.68        | -.08        |
| Ad*Self-Threat*SBC                                                                                | .46                | .21       | 2.19     | .03      | .05         | .87         |
| <i>Outcome: Brand Improvement</i>                                                                 |                    |           |          |          |             |             |
| Intercept                                                                                         | 4.98               | .13       | 39.86    | .00      | 4.74        | 5.23        |
| Ad                                                                                                | -.11               | .12       | -.87     | .39      | -.35        | .14         |
| Self-Imp Thoughts                                                                                 | .09                | .03       | 2.91     | .00      | .03         | .15         |
| <i>Outcome: WTP</i>                                                                               |                    |           |          |          |             |             |
| Intercept                                                                                         | -9.68              | 50.93     | -.19     | .85      | -109.80     | 90.44       |
| Ad                                                                                                | -12.28             | 22.82     | -.54     | .59      | -57.14      | 32.59       |
| Self-Imp Thoughts                                                                                 | 21.41              | 5.80      | 3.69     | .00      | 10.02       | 32.81       |
| Brand Improvement                                                                                 | 39.86              | 9.13      | 4.37     | .00      | 21.91       | 57.81       |
| <i>Conditional Serial Indirect Effect through Self-Improvement Thoughts and Brand Improvement</i> |                    |           |          |          |             |             |
| Low Threat/Low SBC                                                                                | 1.87               | 1.50      |          |          | -.38        | 5.42        |
| Low Threat/High SBC                                                                               | -1.73              | 1.49      |          |          | -5.07       | .75         |
| High Threat/Low SBC                                                                               | 1.72               | 1.52      |          |          | -.84        | 5.17        |
| High Threat/High SBC                                                                              | 3.79               | 2.11      |          |          | .62         | 8.62        |
| <i>Index of Moderated Moderated Mediation</i>                                                     |                    |           |          |          |             |             |
| Index                                                                                             | 1.67               | 1.05      |          |          | .07         | 4.22        |

Note.—Custom PROCESS Model; 5,000 bootstrapped samples; 95% CI. Ad is coded so that 0 = control iPhone ad, 1 = self-improvement iPhone ad. Self-threat is coded so that 0 = low threat, 1 = high threat. Low and high SBC correspond to mean  $\pm$  1 SD of SBC, respectively.
